# Supplementary material for: Dietary Saccharomyces cerevisiae boulardii CNCM I-1079 Positively Affects Performance and Intestinal Ecosystem in Broilers during a Campylobacter jejuni Infection
Source: MDPI journal article supplement (doi:10.3390/microorganisms7120596), 2019-11-21
Supplement: s1 [file s1]

# Color Key

## and Histogram

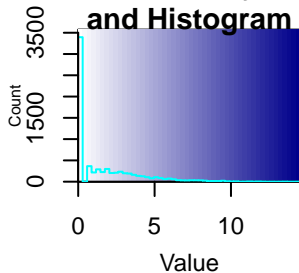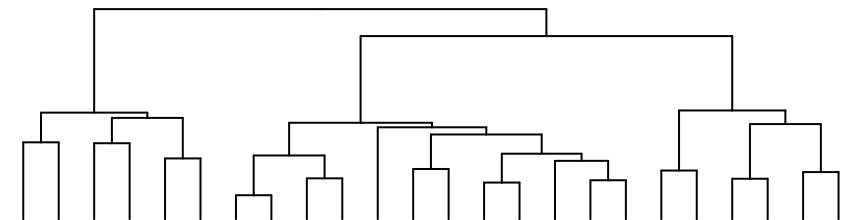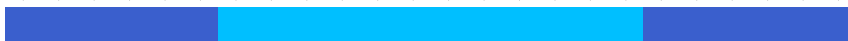

New\_ReferenceOTU11432  
New\_ReferenceOTU10473  
New\_ReferenceOTU128  
New\_ReferenceOTU13190  
157804  
New\_ReferenceOTU31928  
207994  
New\_ReferenceOTU23280  
New\_ReferenceOTU15401  
New\_ReferenceOTU15780  
184248  
New\_CleanUp\_ReferenceOTU  
New\_ReferenceOTU10845  
New\_ReferenceOTU16682  
New\_ReferenceOTU13361  
New\_ReferenceOTU10131  
548821  
New\_CleanUp\_ReferenceOTU  
New\_ReferenceOTU11143  
New\_ReferenceOTU24045  
New\_ReferenceOTU29552  
New\_ReferenceOTU12813  
New\_ReferenceOTU13608  
New\_CleanUp\_ReferenceOTU  
213885  
158217  
591406  
New\_ReferenceOTU6688  
127972  
New\_ReferenceOTU368  
New\_ReferenceOTU10272  
572452  
628226  
590882  
330951  
211553  
158881  
New\_ReferenceOTU20838  
New\_ReferenceOTU16024  
New\_ReferenceOTU13888  
New\_ReferenceOTU35416  
New\_ReferenceOTU29102  
New\_ReferenceOTU14255  
New\_ReferenceOTU14844  
New\_ReferenceOTU32338  
289306  
New\_ReferenceOTU17116  
New\_ReferenceOTU32166  
New\_ReferenceOTU24345  
New\_ReferenceOTU1363  
New\_ReferenceOTU11550  
New\_ReferenceOTU12180  
New\_ReferenceOTU17474  
New\_ReferenceOTU2460  
New\_ReferenceOTU19429  
New\_ReferenceOTU23587  
New\_ReferenceOTU12014  
New\_ReferenceOTU12030  
New\_CleanUp\_ReferenceOTU  
New\_ReferenceOTU10205  
New\_ReferenceOTU1115  
New\_ReferenceOTU12682  
New\_ReferenceOTU36053  
New\_ReferenceOTU11943  
15495  
New\_CleanUp\_ReferenceOTU  
New\_ReferenceOTU27429  
New\_ReferenceOTU1568  
New\_CleanUp\_ReferenceOTU  
New\_ReferenceOTU1473  
59161  
New\_ReferenceOTU35483  
New\_ReferenceOTU24565  
127649  
New\_CleanUp\_ReferenceOTU  
151846  
350036  
New\_ReferenceOTU20142  
988932  
New\_ReferenceOTU19255  
591635  
New\_ReferenceOTU12626  
346246  
New\_ReferenceOTU10451  
298163  
158831  
589307  
158889  
547181  
552669  
New\_ReferenceOTU34825  
526450  
949327  
112158  
515285  
686262  
228252  
297280  
663989  
1111582

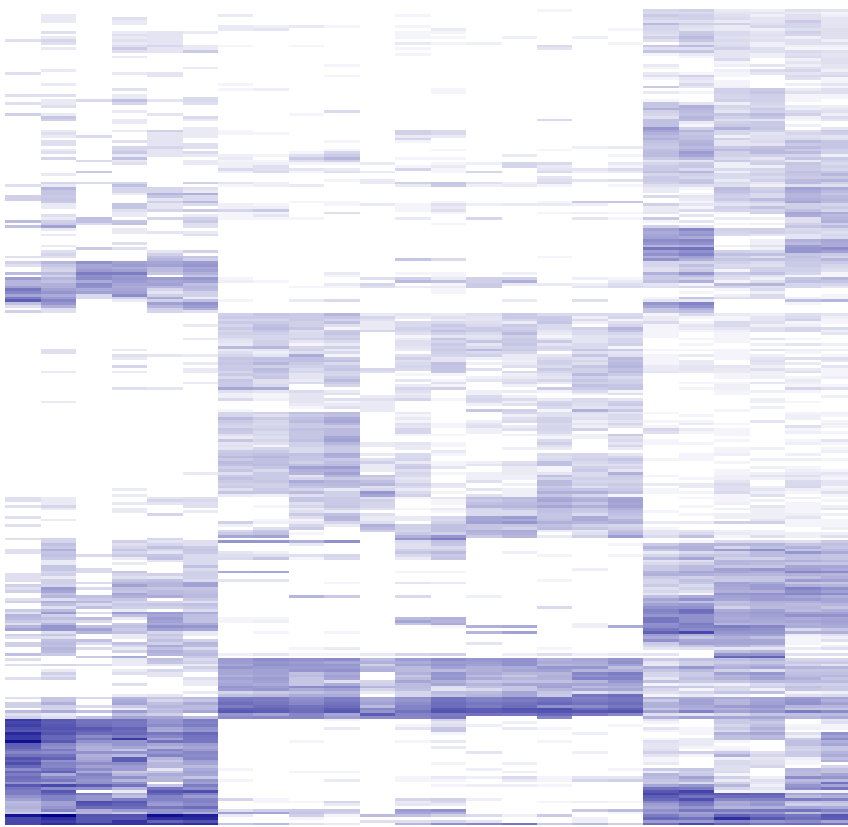

21511F200188  
21511F200178  
21511F200185  
21508F200175  
21511F200197  
21510F200176  
21504F200086  
21506F200150  
21504F200084  
21508F200117  
21508F200093  
21504F200095  
21508F200118  
21504F200097  
21506F200122  
21507F200116  
21504F200088  
21506F200123  
21510F200192  
21507F200171  
21508F200173  
21511F200193  
21508F200169  
21510F200190
