# Supplementary material for: Dietary Saccharomyces cerevisiae boulardii CNCM I-1079 Positively Affects Performance and Intestinal Ecosystem in Broilers during a Campylobacter jejuni Infection
Source: MDPI journal article supplement (doi:10.3390/microorganisms7120596), 2019-11-21
Supplement: s1 [file s1]

# Color Key and Histogram

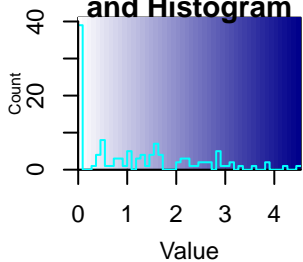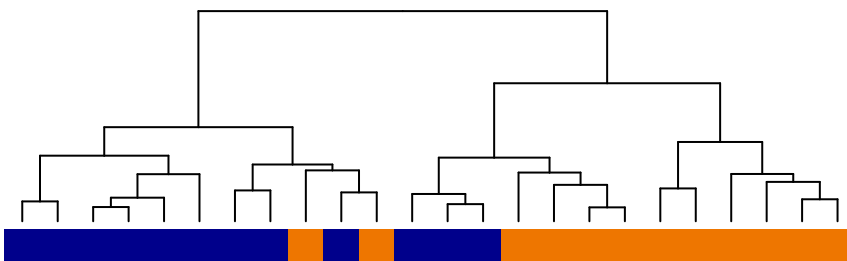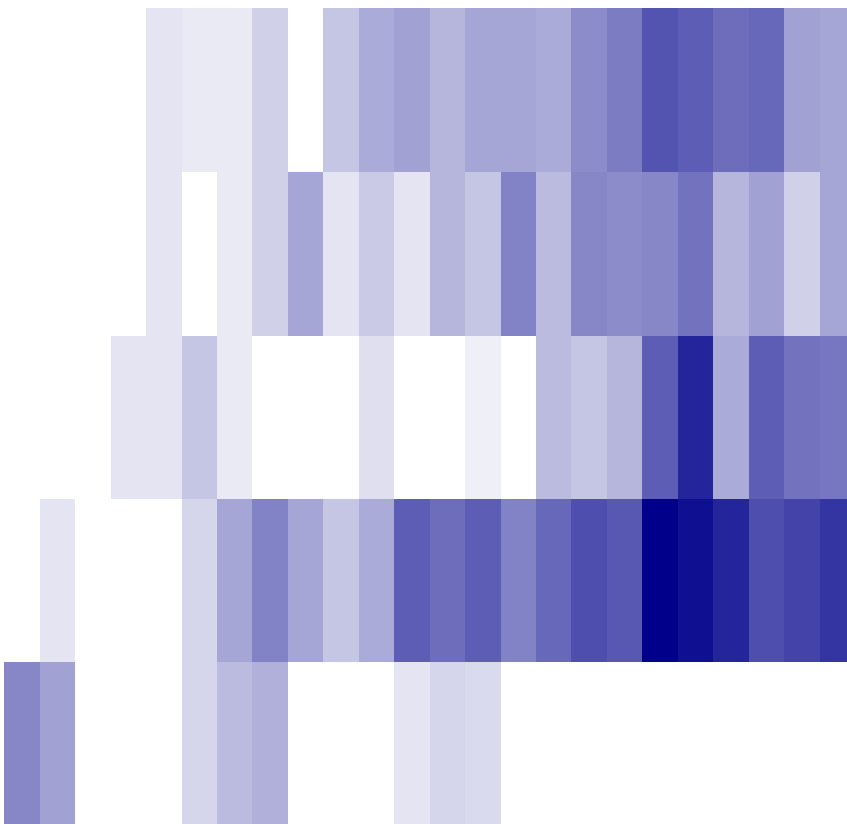

2101FF202028  
2101FF202046  
2101FF202030  
2101FF202048  
2101FF202047  
2101FF202029  
2101FF202049  
2101FF202081  
2101FF202021  
2101FF202045  
2101FF202083  
2101FF202082  
2101FF202020  
2101FF202027  
2101FF202025  
2101FF202087  
2101FF202086  
2101FF202084  
2101FF202023  
2101FF202026  
2101FF202022  
2101FF202085  
2101FF202024  
2101FF202088

New Reference OTU12144  
137580  
433676  
255367  
New Reference OTU11570
