# Supplementary figures and images for: Dietary Saccharomyces cerevisiae boulardii CNCM I-1079 Positively Affects Performance and Intestinal Ecosystem in Broilers during a Campylobacter jejuni Infection
Source: MDPI journal article supplement (doi:10.3390/microorganisms7120596), 2019-11-21

**A****Alpha diversity**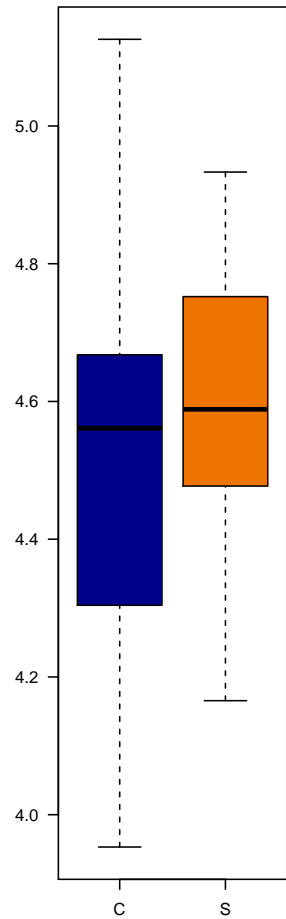**Beta diversity**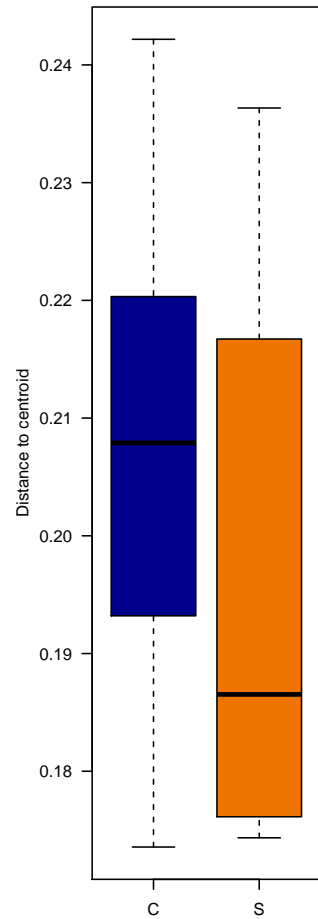**Richness**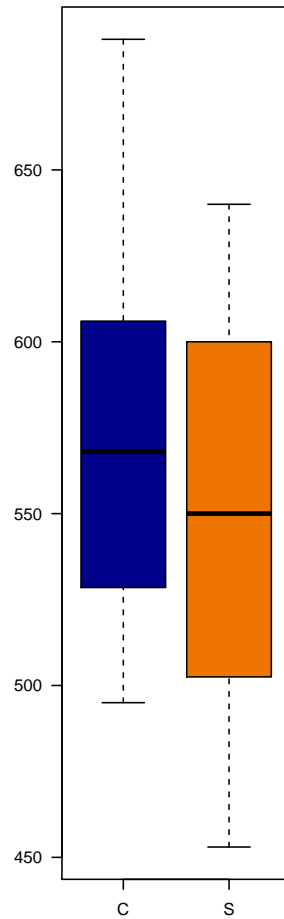**B****Alpha diversity**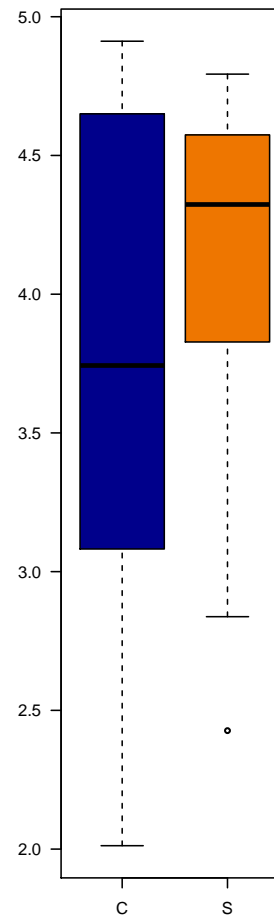**Beta diversity**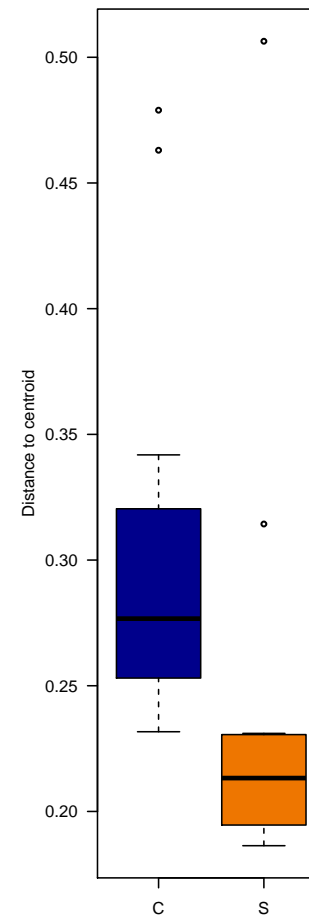**Richness**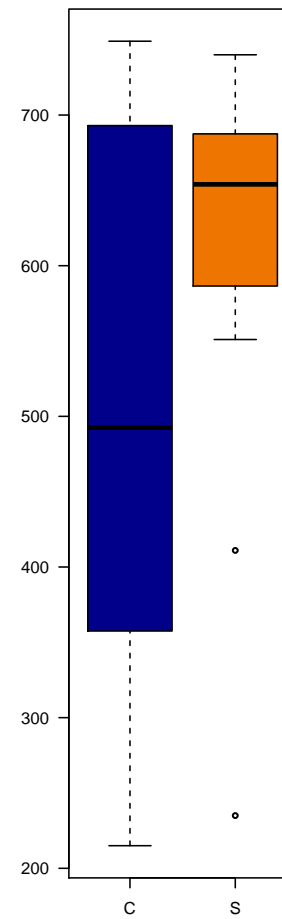

Supplement: s1 [file s1]

# Color Key and Histogram

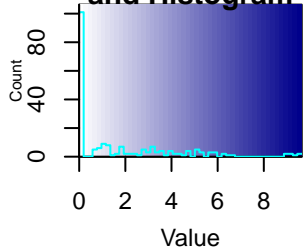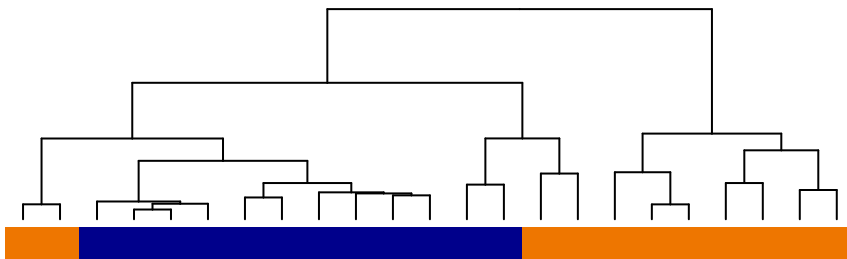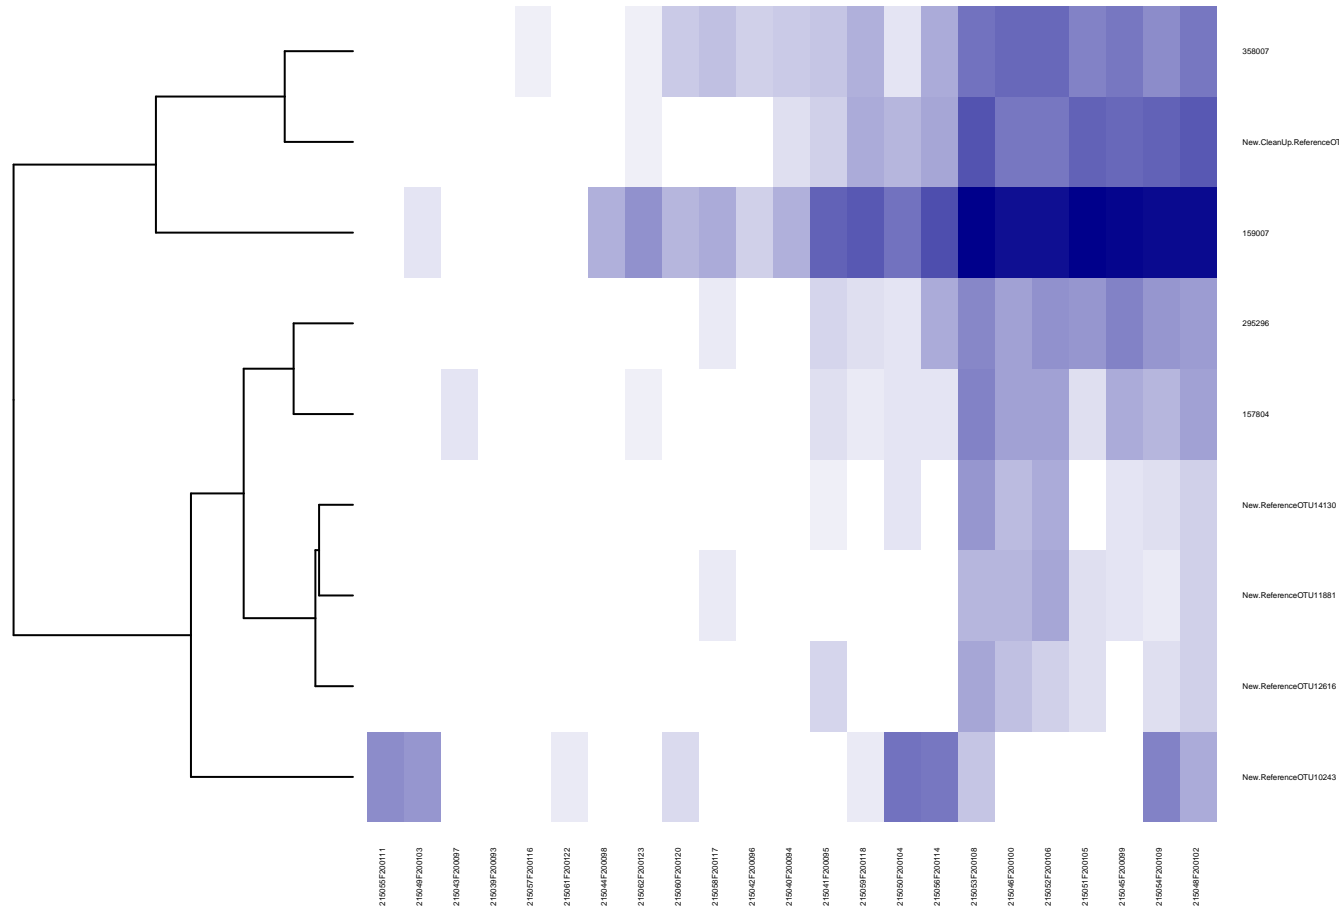

Supplement: s1 [file s1]
